# Supplementary material for: A spatial multi-omics atlas of the human lung reveals a novel gland-associated immune niche
Source: Research Square preprint supplement (doi:10.21203/rs.3.rs-1650134/v1), 2022-05-20
Supplement: Supplementary file 1 [file 6d8088da30c61d3585b4dc3e.xlsx]

## Sheet: Celltype_annotations_comparison
Level 1	Level 2	Level 3	Current study (Madissoon, Oliver et al)	Integrated Human Lung Cell Atlas (Sikkema et al, unpublished)	Travaglini et al. 2020	LungMAP integrated atlas (Sun et al. 2021)	LungMAP CellCards (literature review)	Notes
Epithelial	Airway epithelium	Basal	Basal	Basal_resting	Basal	Basal	Basal
					Proximal Basal*
			Suprabasal	Suprabasal	Differentiating Basal
			Dividing_Basal	Basal proliferating	Proliferating Basal
		Multiciliated lineage	Deuterosomal	Deuterosomal
			Ciliated	Multiciliated (non-nasal)	Ciliated	Ciliated	Ciliated cells
				Multiciliated (nasal)
					Proximal Ciliated*
		Secretory	Secretory_Club	Club (non-nasal)	Club	Secretory cells	Secretory cells
				Club (nasal)
			Secretory_Goblet	Goblet (non-nasal)	Goblet*	Goblet cells	Goblet cell
				Goblet (bronchial)
				Goblet (subsegmental)
				Transitional Club-AT2			Bronchioalveolar stem cells
		Rare	Ionocyte_n_Brush	Ionocyte	Ionocyte
				Tuft		Tuft cells	Tuft cells
			Neuroendocrine	Neuroendocrine	Neuroendocrine*	PNEC: Pulmonary neuroendocrine cells	Pulmonary neuroendocrine cells
	Submucosal Gland	Submucosal secretory	SMG_Serous	SMG serous (bronchial)	Serous*	Serous cells	Serous cells
				SMG serous (nasal)
			SMG_Mucous	SMG mucous	Mucous	Mucous cells	Mucous cells
			SMG_Basal					Identified in Goldfarbmuren et al. Nat Comms 2020 study focusing on epithelial cells
			Myoepithelial					Identified in Goldfarbmuren et al. Nat Comms 2020 study focusing on epithelial cells
			SMG_Duct	SMG duct			Terminal ciliated duct basal cells
	Alveolar epithelium	AT1	AT1	AT1	Alveolar Epithelial Type 1	AT1: Alveolar type 1 cells	Alveolar type 1 cells
		AT2	AT2	AT2	Alveolar Epithelial Type 2	AT2: Alveolar type 2 cells	Alveolar type 2 cells
					Signaling Alveolar Epithelial Type 2*
			Dividing_AT2	AT2 proliferating
Endothelial	Blood vessels	EC arterial	VE_pulmonary_arterial	EC arterial	Artery	Arterial endothelial cells	Arterial endothelial cells
			VE_systemic_aterial
		EC capillary	VE_alveolar_capillary_Car4_aerocyte	EC aerocyte capillary	Capillary Aerocyte	CAP2: Capiliary 2 cells	Capiliary 2 cells
			VE_capillary	EC general capillary	Capillary	CAP1: Capillary 1 cells	Capiliary 1 cells
					Capillary Intermediate 1*
					Capillary Intermediate 2*
		EC venous	VE_systemic_venous	EC venous systemic	Vein	Venous endothelial cells	Venous endothelial cells
			VE_pulmonary_venous	EC venous pulmonary
					Bronchial Vessel 1
					Bronchial Vessel 2
	Lymphatic EC		Endothelial_Lymphatic	Lymphatic EC mature	Lymphatic	Lymphatic endothelial cells	Lymphatic endothelial cells
				Lymphatic EC proliferating
				Lymphatic EC differentiating
Stromal	Fibroblast	Fibroblasts	Fibro_peribronchial	Peribronchial fibroblasts
			Fibro_perichondrial
			Fibro_immune_recruiting
			NAF_endoneurial
			NAF_epineurial
			Fibro_adventitial	Adventitial fibroblasts	Adventitial Fibroblast	Alveolar fibroblast 2 cells	Alveolar fibroblast 2 cells
			Fibro_alveolar	Alveolar fibroblasts	Alveolar Fibroblast	Alveolar fibroblast 1 cells	Alveolar fibroblast 1 cells
					Lipofibroblast
			Muscle_perivascular_immune_recruiting	Pericytes	Pericyte
			Muscle_pericyte_pulmonary
			Muscle_pericyte_systemic
				Subpleural fibroblasts
		Myofibroblasts	Fibro_myofibroblast	Myofibroblasts	Myofibroblast	SCMF: Secondary crest myofibroblasts	Secondary crest myofibroblasts
	Smooth Muscle	Vascular smooth muscle	Muscle_smooth_pulmonary	Smooth Muscle	Vascular Smooth Muscle	VSMC: Vascular smooth muscle cells	Vascular smooth muscle cells
			Muscle_smooth_systemic_arterial
		Airway smooth muscle	Muscle_smooth_airway_ASM		Airway Smooth Muscle	ASMC: Airway smooth muscle cells	Airway smooth muscle cells
		Fibromyocytes			Fibromyocyte*
				SM activated stress response
	Mesothelium		Mesothelia	Mesothelium	Mesothelial*	Mesothelial cells	Mesothelial cells
	Chondrocytes		Chondrocyte
	Schwann		Schwann_nonmyelinating
			Schwann_Myelinating
Immune	Lymphoid	B lineage	B_mature	B cells	B	B cells	B cells (Effector B cells)
			B_naive				B cells (Naïve B cells)
			B_plasma_IgA	Plasma cells	Plasma		Plasma cells
			B_plasma_IgG
			B_plasmablast
		T lineage	T_reg	CD4 T cells		T cells	T cells (CD4 helper - Treg)
			CD4_naive/CM		CD4+ Naive T		T cells (CD4 helper, Th1, Th2, Th17)
			CD4_EM		CD4+ Memory/Effector T
			CD4_TRM				T cells (tisue resident effector memory T cells)
			CD8_TRM	CD8 T cells	CD8+ Memory/Effector T
			CD8_TRM/EM				T cells (CD8 cytotoxic)
			CD8_EM
			CD8_EM/EMRA
					CD8+ Naive T
			MAIT				T cells (mucosal-associated invariant T cells - MAIT)	Not identified in previous lung atlases, but identified in lung in multi-organ immune study (Dominguez Conde C et al.)
			gdT		Natural Killer T* (misannotated, see Figure S3e)		T cells (NKT/iNKT/gdT)	Not identified in previous lung atlases, but identified in lung in multi-organ immune study (Dominguez Conde C et al.)
				T cells proliferating	Proliferating NK/T
			NKT				T cells (NKT/iNKT/gdT)
		Innate lymphoid cells	ILC				ILCs
			NK_CD16hi	NK cells	Natural Killer	NK: Natural killer cells	NK cells
			NK_CD11d
			NK_CD56bright
	Myeloid	Dendritic cells	DC_1	DC1	Myeloid Dendritic Type 1	mDC1: Myeloid dendritic subset 1	Dendritic cells (cDC1)
			DC_2	DC2	Myeloid Dendritic Type 2	mDC2: Myeloid dendritic subset 2	Dendritic cells (cDC2)
			pcDC	Plasmacytoid DCs	Plasmacytoid Dendritic
			DC_activated	Migratory DCs
					EREG+ Dendritic
					TREM2+ Dendritic
		Macrophages	Macro_dividing	Alveolar Mφ proliferating	Proliferating Macrophage	aMacs: Alveolar macrophages	Alveolar Macrophages
			Macro_alv	Alveolar macrophages	Macrophage
			Macro_CCL	Alveolar Mφ CCL3+
			Macro_alv_MT	Alveolar Mφ MT-positive
			Macro_CHIT
			Macro_AW_CX3CR1
			Macrophage_intermediate	Monocyte-derived Mφ
			Macro_interstitial	Interstitial Mφ perivascular		iMacs: Interstitial macrophages	Interstitial macrophages
			Macro_intravascular		IGSF21+ Dendritic (misannotated, see Figure S3e)
		Monocyte	Monocyte_CD14	Classical monocyte	Classical Monocyte	Monocytes	Inflammatory monocytes/macrophages
					OLR1+ Classical Monocyte*
			Monocyte_CD16	Non-classical monocyte	Nonclassical Monocyte		Patrolling monocytes/macrophage
					Intermediate Monocyte*
		Mast cells	Mast_cell	Mast cells	Basophil/Mast 1	Basophils/Mast cells	Mast cells
					Basophil/Mast 2*		Basophils
		Neutrophilic			Neutrophil		Neutrophil
		Megakaryocytes	Megakaryocyte		Platelet/Megakaryocyte
Erythroid	Erythrocytes		Erythrocyte
					* denotes cell populations that were found only in one donor
			Colour codes:
			New cell type annotated compared to published lung atlas studies
			New cell state/increased resolution compared to other lung atlas studies
